# Supplementary material for: Reversible Cause of Cardiac Arrest and Secondary Prevention Implantable Cardioverter Defibrillators in Patients With Coronary Artery Disease: Value of Complete Revascularization and LGE‐CMR
Source: PubMed Central journal article supplement — J Am Heart Assoc. 2021 Apr 6;10(8):e019101. doi: 10.1161/JAHA.120.019101 (PMC8174172; doi:10.1161/jaha.120.019101), 2021-04-06
Supplement: JAH3-10-e019101-s001.pdf [file JAH3-10-e019101-s001.pdf]

# **SUPPLEMENTAL MATERIAL**

**Table S1. Patient characteristics with and without a CTO.**

| <b>Characteristics</b>                | <b>CTO absent<br/>(n=176)</b> | <b>CTO present<br/>(n=100)</b> | <b>P-<br/>value</b> |
|---------------------------------------|-------------------------------|--------------------------------|---------------------|
| Age (years)                           | 67 ± 10                       | 66 ± 10                        | 0.61                |
| Male sex                              | 154 (88%)                     | 88 (88%)                       | 0.90                |
| Diabetes mellitus                     | 28 (16%)                      | 28 (28%)                       | 0.02                |
| Hypertension                          | 76 (54%)                      | 44 (49%)                       | 0.46                |
| Hyperlipidemia                        | 49 (37%)                      | 33 (38%)                       | 0.84                |
| BMI (kg/m <sup>2</sup> )              | 27 ± 4                        | 27 ± 5                         | 0.92                |
| Prior MI                              | 113 (64%)                     | 67 (67%)                       | 0.64                |
| Prior PCI                             | 62 (35%)                      | 28 (28%)                       | 0.22                |
| Prior CABG                            | 61 (35%)                      | N/A                            | N/A                 |
| Atrial fibrillation                   | 56 (32%)                      | 33 (33%)                       | 0.84                |
| Creatinine (µmol/L)                   | 85 (76 - 99)                  | 87 (75 - 103)                  | 0.99†               |
| QRS duration (ms)                     | 114 ± 26                      | 111 ± 20                       | 0.30                |
| LVEF (%)                              | 38 ± 12                       | 38 ± 11                        | 0.69                |
| No. of segments with<br>ischemic LGE* | 4 (2-6)                       | 6 (5-7)                        | <0.01†              |
| No. transmural ischemic<br>segments*  | 3 (0 – 4)                     | 4 (2 – 6)                      | 0.03†               |
| No. subendocardial<br>segments*       | 1 (0 – 3)                     | 1 (0 – 4)                      | 0.61†               |
| ACEi/ARB                              | 150 (85%)                     | 87 (87%)                       | 0.68                |
| Beta-blockers                         | 163 (93%)                     | 88 (88%)                       | 0.20                |
| Amiodarone                            | 24 (14%)                      | 15 (15%)                       | 0.76                |

|       |           |          |      |
|-------|-----------|----------|------|
| ICD   | 162 (92%) | 97 (97%) | 0.10 |
| CRT-D | 14 (8%)   | 3 (3%)   | 0.10 |

Dichotomous variables compared using the chi-square test or Fischer's exact test. Continuous variables compared using t-tests unless otherwise indicated. \* based on 166 patients; † tested using Mann-Whitney U test. ACEi, angiotensin converting enzyme inhibitors; ARB, angiotensin receptor blocker; BMI; body mass index; CABG, coronary arterial bypass graft surgery; CRT-D, resynchronisation therapy; ICD, implantable cardioverter defibrillator; LGE, late gadolinium enhancement; LVEF, left ventricular ejection fraction; MI; myocardial infarction; PCI, percutaneous coronary intervention.

**Table S2. Patient characteristics with and without LGE-CMR.**

| Characteristics                                         | Total Cohort<br>(n=276) | Patients without<br>CMR<br>(n=110) | Patients with CMR<br>(n=166) | P-value |
|---------------------------------------------------------|-------------------------|------------------------------------|------------------------------|---------|
| ICD-off-label group                                     | 48 (17%)                | 16 (15%)                           | 32 (19%)                     | 0.31    |
| Age (years)                                             | 67 ± 10                 | 70 ± 8                             | 65 ± 10                      | <0.01   |
| Male sex                                                | 242 (80%)               | 97 (82%)                           | 145 (87%)                    | 0.84    |
| Amsterdam UMC, Vrije<br>Universiteit                    | 190 (69%)               | 66 (60%)                           | 124 (75%)                    | 0.10    |
| Northwest Clinics<br>Alkmaar                            | 86 (31%)                | 44 (40%)                           | 42 (25%)                     | 0.10    |
| <b>Cardiovascular risk factors</b>                      |                         |                                    |                              |         |
| Diabetes mellitus                                       | 56 (20%)                | 22 (20%)                           | 34 (21%)                     | 0.92    |
| Hypertension                                            | 120 (44%)               | 47 (57%)                           | 73 (49%)                     | 0.29    |
| Hyperlipidemia                                          | 82 (30%)                | 27 (35%)                           | 55 (38%)                     | 0.65    |
| BMI (kg/m <sup>2</sup> )                                | 27 ± 4                  | 27 ± 4                             | 27 ± 4                       | 0.55    |
| <b>Medical history</b>                                  |                         |                                    |                              |         |
| Prior MI                                                | 180 (65%)               | 66 (60%)                           | 114 (69%)                    | 0.14    |
| Prior PCI                                               | 90 (33%)                | 40 (36%)                           | 50 (30%)                     | 0.28    |
| Prior CABG                                              | 61 (22%)                | 36 (33%)                           | 25 (15%)                     | <0.01   |
| LVEF (%)*                                               | 38 ± 11                 | 36 ± 9                             | 39 ± 12                      | 0.17    |
| Atrial fibrillation                                     | 89 (32%)                | 39 (36%)                           | 50 (30%)                     | 0.35    |
| Creatinine (µmol/L)                                     | 86 (76 – 102)           | 91 (77 – 103)                      | 85 (75 – 99)                 | 0.34§   |
| QRS duration (ms)                                       | 108 (96 – 126)          | 110 (96 – 130)                     | 106 (96 – 122)               | 0.24§   |
| <b>Cardiac findings and intervention at index event</b> |                         |                                    |                              |         |
| VF at time of OHCA                                      | 180 (65%)               | 65 (59%)                           | 115 (69%)                    | 0.08    |

|                                                      |                    |                    |                    |        |
|------------------------------------------------------|--------------------|--------------------|--------------------|--------|
| CK-MB † (ug/L)                                       | 22 (8 - 45)        | 37 (12 – 73)       | 19 (7 – 39)        | 0.01§  |
| Troponine T ‡ (ug/L)                                 | 0.33 (0.11 – 0.98) | 0.43 (0.10 – 1.37) | 0.31 (0.12 – 0.87) | 0.74§  |
| Moderate/extensive<br>exercise prior to arrest       | 69 (25%)           | 22 (22%)           | 47 (28%)           | 0.27   |
| Diffuse non-obstructive<br>CAD                       | 74 (26%)           | 32 (29%)           | 42 (25%)           | 0.49   |
| Multivessel disease                                  | 163 (59%)          | 76 (69%)           | 87 (52%)           | <0.01  |
| CTO present<br>(no prior CABG)                       | 100 (36%)          | 35 (32%)           | 65 (39%)           | 0.21   |
| PCI performed                                        | 102 (37%)          | 37 (34%)           | 65 (39%)           | 0.35   |
| CABG performed                                       | 26 (9%)            | 12 (11%)           | 14 (8%)            | 0.49   |
| Complete<br>revascularization                        | 143 (52%)          | 57 (52%)           | 86 (52%)           | 0.99   |
| <b><i>Medication at time of ICD implantation</i></b> |                    |                    |                    |        |
| ACEi/ARB                                             | 237 (86%)          | 93 (85%)           | 144 (87%)          | 0.61   |
| Beta-blockers                                        | 251 (91%)          | 97 (88%)           | 154 (93%)          | 0.19   |
| Ca channel blocker                                   | 23 (8%)            | 10 (9%)            | 13 (8%)            | 0.71   |
| Amiodarone                                           | 39 (14%)           | 20 (18%)           | 19 (11%)           | 0.12   |
| <b><i>Device Type and procedures</i></b>             |                    |                    |                    |        |
| Upgrade procedures                                   | 15 (5%)            | 15 (14%)           | 0 (0%)             | <0.001 |
| ICD                                                  | 259 (94%)          | 103 (94%)          | 156 (94%)          | 0.91   |
| CRT-D                                                | 17 (6%)            | 7 (6%)             | 10 (6%)            | 0.91   |
| <b><i>End points</i></b>                             |                    |                    |                    |        |
| Appropriate device<br>therapy                        | 106 (38%)          | 43 (39%)           | 63 (38%)           | 0.85   |

|                     |          |          |          |      |
|---------------------|----------|----------|----------|------|
| All-cause mortality | 40 (15%) | 18 (16%) | 22 (13%) | 0.47 |
|---------------------|----------|----------|----------|------|

Dichotomous variables compared using the chi-square test or Fischer's exact test. Continuous variables compared using t-tests unless otherwise indicated.\* based on 199 patients; † based on N=151; ‡ based on N=156; § tested using Mann-Whitney U test. ACEi, angiotensin converting enzyme inhibitors; ARB, angiotensin receptor blocker; BMI, body mass index; Ca, calcium; CABG, coronary arterial bypass graft surgery; CAD, coronary artery disease; CK-MB, creatinine kinase myocardial band, CRT-D, resynchronisation therapy; CTO, coronary chronic total occlusion; ICD, implantable cardioverter defibrillator; LVEF, left ventricular ejection fraction; MI, myocardial infarction; PCI, percutaneous coronary intervention; VF, ventricular fibrillation.

**Table S3. Outcomes in the LGE-CMR-subgroup.**

| <b>Parameters</b>                               | <b>Study cohort<br/>with CMR<br/>(n=166)</b> | <b>ICD-per-guideline<br/>with CMR<br/>(n=134)</b> | <b>ICD-off-label<br/>with CMR<br/>(n=32)</b> | <b>P-value</b> |
|-------------------------------------------------|----------------------------------------------|---------------------------------------------------|----------------------------------------------|----------------|
| Appropriate ICD therapy                         | 63 (38%)                                     | 57 (43%)                                          | 6 (19%)                                      | 0.01           |
| ATP only                                        | 34 (20%)                                     | 31 (23%)                                          | 3 (9%)                                       | 0.08           |
| ICD Shock                                       | 29 (17%)                                     | 26 (19%)                                          | 3 (9%)                                       | 0.18           |
| Cumulative number of ICD<br>therapy per patient | 2 (1-4)                                      | 2 (1-4)                                           | 3 (2-3)                                      | 0.92*          |
| VT ablation                                     | 15 (9%)                                      | 15 (11%)                                          | 0                                            | 0.08           |
| All-cause mortality                             | 22 (13%)                                     | 18 (13%)                                          | 4 (13%)                                      | 0.89           |

Dichotomous variables compared using the chi-square test or Fischer's exact test. Continuous variables compared using the Mann-Whitney U test. \* tested using Mann-Whitney U test. ATP, anti-tachycardia pacing; CMR, cardiac magnetic resonance; ICD, implantable cardioverter defibrillator; VT ventricular tachycardia.

**Table S4. Univariable and multivariable Cox regression analysis of clinical parameters for predicting appropriate device therapy in the total study cohort.**

| Parameter                    | HR (95% CI)        | P-value | HR (95% CI)                   | P-value |
|------------------------------|--------------------|---------|-------------------------------|---------|
| <b>N=276</b>                 |                    |         |                               |         |
| <b>Univariable analysis</b>  |                    |         | <b>Multivariable analysis</b> |         |
| Age (years)                  | 1.03 (1.01 – 1.05) | 0.01    | 1.02 (1.01 – 1.04)            | 0.04    |
| Male sex                     | 2.10 (1.02 – 4.33) | 0.04    | 2.39 (1.16 – 4.94)            | 0.02    |
| Diabetes mellitus            | 1.15 (0.72 – 1.85) | 0.55    |                               |         |
| Prior MI                     | 1.95 (1.25 – 3.05) | <0.01   | 1.64 (1.04 – 2.60)            | 0.03    |
| Atrial fibrillation          | 1.20 (0.80 – 1.80) | 0.38    |                               |         |
| Beta-blocking therapy        | 1.00 (0.49 – 2.07) | 0.99    |                               |         |
| Creatinine (μmol/L)          | 1.00 (0.99 – 1.00) | 0.66    |                               |         |
| LVEF<35%                     | 1.48 (0.90 – 2.43) | 0.13    |                               |         |
| Moderate-Intensive exercise  | 0.83 (0.52 – 1.32) | 0.43    |                               |         |
| CK-MB                        | 1.00 (0.99 – 1.00) | 0.53    |                               |         |
| Multivessel CAD              | 1.24 (0.84 – 1.82) | 0.29    |                               |         |
| Incomplete revascularization | 1.54 (1.05 – 2.26) | 0.03    | -                             | -       |
| Untreated CTO                | 1.34 (0.88 – 2.02) | 0.17    |                               |         |
| ICD-Per-Guideline            | 3.30 (1.53 – 7.11) | <0.01   | 2.99 (1.40 – 6.47)            | <0.01   |
| CRT-D                        | 1.73 (0.87 – 3.44) | 0.12    |                               |         |

CAD, coronary artery disease; CK-MB, creatinine kinase myocardial band, CRT-D, resynchronization therapy defibrillator; CTO, coronary chronic total occlusion, ICD, implantable cardioverter defibrillator; LVEF, left ventricular ejection fraction; MI, myocardial infarction.



**Figure S1. Case examples of ICD-off-label patients.**

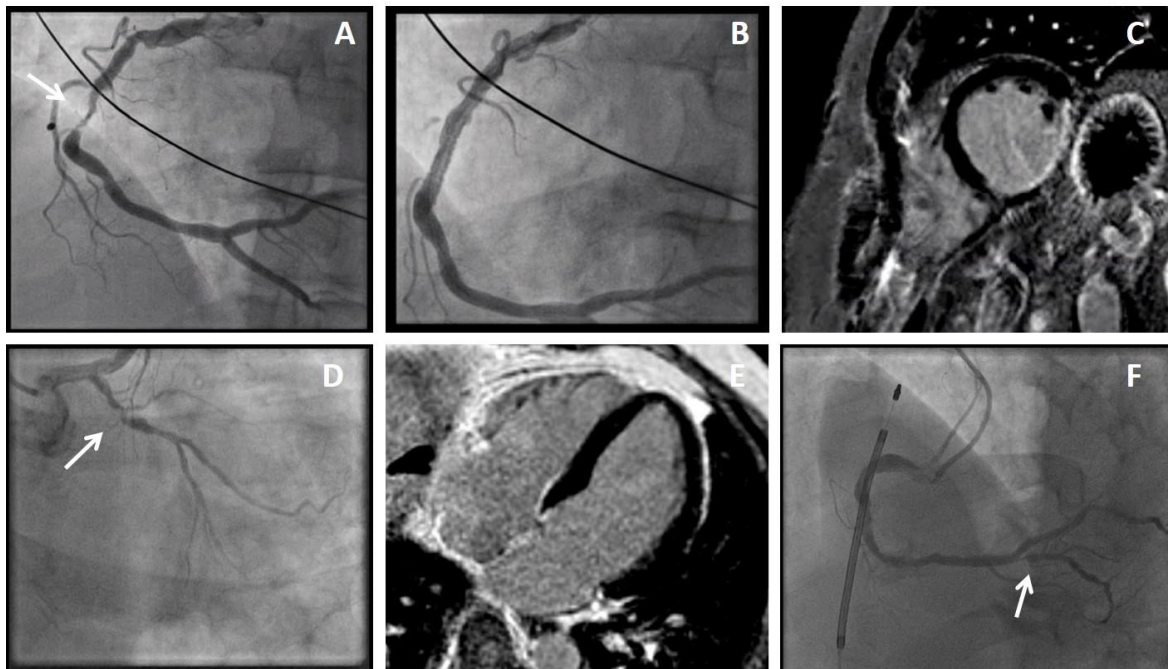

Case examples of two off-label patients. Case example 1 (A-C) is a patient with a history of a inferoposterolateral myocardial infarction. Acute angiography revealed a significant stenosis of the RCA (A), which was successfully treated with PCI (B). LGE-CMR showed a large transmural infarction in the inferolateral wall and a moderate LV function (LVEF 39%) (C). At follow-up the patient received two ICD shocks for VT. Case example 2 (D-F) is a patient without a cardiac history. After index cardiac arrest the angiography showed two significant stenosis of the RCX and RCA (D), which were both successfully stented. CMR revealed a good cardiac function (LVEF 55%) and without LGE. During follow-up, the patient developed VF and received an ICD shock. Repeated angiography revealed a newly developed stenosis of the RCA (F).
